# Supplementary material for: The endemic plants of Mozambique: diversity and conservation status
Source: PhytoKeys. 2019 Dec 11;136:45–96. doi: 10.3897/phytokeys.136.39020 (PMC6920223; doi:10.3897/phytokeys.136.39020)
Supplement: Supplementary material 2 [file phytokeys-136-045-s002.xlsx]

## Sheet: Sheet1
Family	Taxon
Acanthaceae	Anisotes longistrobus (C.B.Clarke) Vollesen
Acanthaceae	Barleria nyasensis C.B.Clarke
Acanthaceae	Barleria rhynchocarpa Klotzsch
Acanthaceae	Barleria whytei S.Moore
Acanthaceae	Blepharis obermeyerae Vollesen
Acanthaceae	Crossandra fruticulosa Lindau
Acanthaceae	Crossandra greenstockii S.Moore
Acanthaceae	Crossandra pyrophila Vollesen
Acanthaceae	Dicliptera minor C.B.Clarke subsp. divaricata (Compton) I.Darbysh.
Acanthaceae	Isoglossa milanjiensis S.Moore
Acanthaceae	Justicia aconitiflora (A.Meeuse) Vollesen
Achariaceae	Xylotheca kraussiana Hochst. var. glabrifolia Wild
Achariaceae	Xylotheca kraussiana Hochst. var. kraussiana
Amaryllidaceae	Cyrtanthus rhodesianus Rendle
Annonaceae	Dielsiothamnus divaricatus (Diels) R.E.Fr.
Annonaceae	Monodora minor Engl. & Diels
Annonaceae	Xylopia collina Diels
Annonaceae	Xylopia gracilipes D.M.Johnson & N.A.Murray
Apiaceae	Diplolophium buchananii (Oliv.) Norman subsp. buchananii
Apiaceae	Diplolophium buchananii (Oliv.) Norman subsp. swynnertonii (Baker f.) Cannon
Apocynaceae	Adenium swazicum Stapf
Apocynaceae	Aspidoglossum delagoense (Schltr.) Kupicha
Apocynaceae	Carissa praetermissa Kupicha
Apocynaceae	Carvalhoa campanulata K.Schum.
Apocynaceae	Ceropegia filifolia (Schltr.) Bruyns (=Brachystelma filifolium (Schltr.) Peckover)
Apocynaceae	Ceropegia praelonga (S.Moore) Bruyns (=Brachystelma praelongum S.Moore)
Apocynaceae	Ceropegia simplex (Schltr.) Bruyns (syn. Brachystelma simplex Schltr.)
Apocynaceae	Cryptolepis delagoensis Schltr.
Apocynaceae	Marsdenia cynanchoides Schltr.
Apocynaceae	Orbea paradoxa (I.Verd.) L.C.Leach
Apocynaceae	Orbea umbracula (M.D.Hend.) L.C.Leach
Apocynaceae	Pleioceras orientale Vollesen
Apocynaceae	Raphionacme lucens Venter & R.L.Verh.
Apocynaceae	Strophanthus gerrardii Stapf
Araceae	Gonatopus petiolulatus (Peter) Bogner
Araliaceae	Cussonia zuluensis Strey
Asparagaceae	Asparagus densiflorus (Kunth) Jessop
Asparagaceae	Dracaena canaliculata (Carriere) Byng & Christenh. (=Sansevieria canaliculata Carriere)
Asparagaceae	Dracaena reflexa Lam.
Asphodeleaceae	Aloe cooperi Baker subsp. cooperi
Asphodeleaceae	Aloe menyharthii Baker subsp. menyharthii
Asphodeleaceae	Aloe parvibracteata Schonland (incl. A. keithii and A. komatiensis)
Asphodeleaceae	Aloe rhodesiana Rendle
Asphodeleaceae	Aloe rupestris Baker
Asphodeleaceae	Aloe swynnertonii Rendle
Asphodeleaceae	Haworthia limifolia Marloth var. limifolia
Asteraceae	Dicoma zeyheri Sond.
Asteraceae	Geigeria ornativa O.Hoffm. subsp. orientalis Wild
Balsaminaceae	Impatiens oreocallis Launert
Boraginaceae	Cordia torrei E.S.Martins
Capparaceae	Capparis viminea Oliv. var. viminea (= C. lilacina Gilg)
Caryophyllaceae	Krauseola mosambicina (Moss) Pax & K.Hoffm.
Celastraceae	Putterlickia neglecta Jordaan, R.G.C.Boon & A.E. van Wyk
Celastraceae	Salacia kraussii Harv.
Celastraceae	Trochantha graciliflora (Welw. ex Oliv.) R.H.Archer subsp. newalensis (Blakelock) R.H.Archer (=Pristimera graciliflora (Welw. ex Oliv.) N.Hallé subsp. newalensis (Blakelock) N.Hallé)
Combretaceae	Combretum mkuzense J.D.Carr & Retief
Combretaceae	Combretum xanthothyrsum Engl. & Diels
Combretaceae	Terminalia phanerophlebia Engl.& Diels
Connaraceae	Vismianthus punctatus Mildbr.
Crassulaceae	Crassula alticola R.Fern.
Crassulaceae	Kalanchoe latisepala N.E.Br.
Crassulaceae	Kalanchoe neglecta Toelken (incl. K. rotundifolia (Haw.) Haw. forma peltata R.Fern.)
Cucurbitaceae	Coccinia subglabra C.Jeffrey
Cucurbitaceae	Eureiandra eburnea C.Jeffrey
Cyperaceae	Bulbostylis parvinux C.B.Clarke (several synonyms)
Cyperaceae	Kyllinga sp. near nervosa
Cyperaceae	Scleria pachyrrhyncha Nelmes
Cyperaceae	Scleria sobolifer E.F.Franklin
Dichapetalaceae	Dichapetalum edule Engl.
Dioscoreaceae	Dioscorea sylvatica Eckl.
Ebenaceae	Diospyros inhacaensis F.White
Ebenaceae	Diospyros mafiensis F.White
Ebenaceae	Diospyros truncatifolia A.N.Caveney
Ebenaceae	Diospyros verrucosa Hiern
Ebenaceae	Euclea natalensis A.DC. subsp. rotundifolia F.White
Ebenaceae	Euclea racemosa Murr. subsp. zuluensis F.White
Ericaceae	Vaccinium madagascariense (Poir.) Sleumer
Erythroxylaceae	Erythroxylum gerrardii Baker
Euphorbiaceae	Acalypha sonderiana Müll.Arg.
Euphorbiaceae	Euphorbia clavigera N.E.Br. (incl. E. persistens)
Euphorbiaceae	Euphorbia lividiflora L.C.Leach
Euphorbiaceae	Euphorbia tortirama R.A.Dyer
Euphorbiaceae	Heywoodia lucens Sim
Euphorbiaceae	Jatropha hirsuta Krauss
Euphorbiaceae	Paranecepsia alchorneifolia Radcl.-Sm.
Euphorbiaceae	Plesiatropha carpinifolia (Pax) Breteler (=Mildbraedia carpinifolia (Pax) Hutch.)
Euphorbiaceae	Tannodia swynnertonii (S.Moore) Prain
Euphorbiaceae	Tragia wahlbergiana Prain
Fabaceae	Acacia davyi N.E.Br.
Fabaceae	Acacia kosiensis PP.Sw. ex Coates Palgr.
Fabaceae	Acacia kraussiana Benth.
Fabaceae	Acacia swazica Burtt Davy
Fabaceae	Aeschynomene nematopoda Harms
Fabaceae	Craibia brevicaudata (Vatke) Dunn subsp. schliebenii (Harms) J. B. Gillett
Fabaceae	Crotalaria agatiflora Schweinf. subsp. vaginifera Polhill
Fabaceae	Crotalaria collina Polhill
Fabaceae	Dialium holtzii Harms
Fabaceae	Erythrina haerdii Verdc.
Fabaceae	Guibourtia schliebenii (Harms) J.Leonard
Fabaceae	Indigofera delagoaensis J.B.Gillett
Fabaceae	Indigofera hedyantha Eckl. & Zeyh. subsp. robusta Schrire
Fabaceae	Indigofera lydenburgensis N.E.Br.
Fabaceae	Indigofera mimosoides Baker var. brachycarpa J.B.Gillett
Fabaceae	Indigofera rostrata Bolus subsp. namaachensis Schrire
Fabaceae	Indigofera setiflora Baker var. corbyi Schrire
Fabaceae	Indigofera williamsonii (Harv.) N.E.Br.
Fabaceae	Millettia bussei Harms
Fabaceae	Millettia impressa Harms subsp. goetzeana (Harms) J.B.Gillett
Fabaceae	Mimosa busseana Harms
Fabaceae	Ormocarpum zambesianum Verdc.
Fabaceae	Platysepalum inopinatum Harms
Fabaceae	Pseudoprosopis euryphylla Harms
Fabaceae	Pterocarpus megalocarpus Harms
Fabaceae	Rhynchosia totta (Thunb.) DC. var. elegantissima (Schinz) Verdc.
Fabaceae	Schotia capitata Bolle
Fabaceae	Tephrosia brummittii Schrire
Fabaceae	Xylia africana Harms
Gentianaceae	Swertia pleurogynoides Baker
Iridaceae	Aristea polycephala Harms
Iridaceae	Dianella ensifolia (L.) DC.
Iridaceae	Freesia laxa (Thunb.) Goldblatt & J.C.Manning subsp. azurea (Goldblatt & Hutchings) Goldblatt & J.C.Manning (= Anomatheca laxa (Thunb.) Goldblatt subsp. azurea Goldblatt & Hutchings)
Iridaceae	Gladiolus juncifolius Goldblatt
Iridaceae	Gladiolus zambesiacus Baker
Lamiaceae	Achyrospermum laterale Baker
Lamiaceae	Acrotome thorncroftii Skan
Lamiaceae	Micromeria imbricata (Forssk.) C.Chr. var. rhodesiaca (E.& K.H.Walther) Ryding
Lamiaceae	Premna schliebenii Werderm.
Lamiaceae	Syncolostemon petiolatus (Ashby) D.F.Otieno
Lamiaceae	Tinnea galpinii Briq.
Loganiaceae	Strychnos mellodora S.Moore
Loganiaceae	Strychnos myrtoides Gilg & Busse
Loranthaceae	Agelanthus gracilis (Tölken & Wiens) Polhill & Wiens
Loranthaceae	Erianthemum lindense (Sprague) Danser
Loranthaceae	Plicosepalus amplexicaulis Wiens
Malvaceae	Cienfuegosia gerrardii (Harv.) Hochr.
Malvaceae	Cola discoglypremnophylla Brenan & A.P.D.Jones
Malvaceae	Cola dorrii Cheek
Malvaceae	Grewia conocarpa K.Schum.
Malvaceae	Hibiscus barbosae Exell
Malvaceae	Sterculia schliebenii Mildbr.
Malvaceae	Thespesia acutiloba (Baker f.) Exell & Mendonca
Malvaceae	Hildegardia migeodii (Exell) Kosterm.
Montiniaceae	Grevea eggelingii Milne-Redh. var. eggelingii
Myrtaceae	Eugenia capensis (Eckl. & Zeyh.) Sond. subsp. capensis
Nyctaginaceae	Commicarpus chinensis (L.) Heimerl subsp. natalensis Meikle
Olacaceae	Olax pentandra Sleumer
Orchidaceae	Angraecum calceolus Thouars
Orchidaceae	Bolusiella maudiae (Bolus) Schltr.
Orchidaceae	Habenaria arenaria Lindl.
Orchidaceae	Mystacidium venosum Rolfe
Pandanaceae	Pandanus livingstonianus Rendle
Passifloraceae	Adenia schliebenii Harms
Passifloraceae	Paropsia braunii Gilg
Passifloraceae	Paropsia grewioides Mast. var. orientalis Sleumer
Polygonaceae	Oxygonum robustum Germish.
Putranjivaceae	Drypetes sclerophylla Mildbr.
Rubiaceae	Coffea zanguebariae Lour.
Rubiaceae	Cuviera tomentosa Verdc.
Rubiaceae	Gardenia cornuta Hemsl.
Rubiaceae	Kraussia floribunda Harv.
Rubiaceae	Oxyanthus querimbensis Klotzsch - uncertain taxon
Rubiaceae	Pavetta edentula Sond.
Rubiaceae	Pavetta fascifolia Bremek.
Rubiaceae	Pavetta lutambensis Mildbr. ex Bremek.
Rubiaceae	Pavetta macrosepala Hiern var. macrosepala
Rubiaceae	Pavetta pseudoalbicaulis Bridson
Rubiaceae	Pavetta refractifolia K.Schum.
Rubiaceae	Psydrax locuples (K.Schum.) Bridson
Rubiaceae	Spermacoce latituba (K.Schum.) Verdc.
Rutaceae	Vepris gerrardii (I.Verd.) E.J.D.Schmidt & J.E.Burrows
Rutaceae	Zanthoxylum lindense (Engl.) Kokwaro
Santalaceae	Thesium brevibarbatum Pilg.
Santalaceae	Viscum obovatum Harv.
Sapindaceae	Allophyllus chirindensis Baker f.
Scrophulariaceae	Zaluzianskya tropicalis Hilliard
Velloziaceae	Xerophyta tanzaniana Behnke
Verbenaceae	Chascanum schlechteri (Gurke) Moldenke var. schlechteri
Violaceae	Rinorea welwitschii (Oliv.) Kuntze subsp. tanzanica Grey-Wilson
Vitaceae	Cyphostemma quinatum (Dryand.) Desc. ex Wild & R.B.Drumm.
Xyridaceae	Xyris natalensis L.A.Nilsson
Zamiaceae	Encephalartos lebomboensis I.Verd.
Zamiaceae	Encephalartos manikensis (Gilliland) Gilliland
Zamiaceae	Stangeria eriopus (Kunze) Baill.
Zosteraceae	Zostera capensis Setch.
